# Supplementary material for: PRMT1 Regulates EGFR and Wnt Signaling Pathways and Is a Promising Target for Combinatorial Treatment of Breast Cancer
Source: MDPI journal article supplement (doi:10.3390/cancers14020306), 2022-01-08
Supplement: s1 [file s1]

## **Supplementary information for**

### **PRMT1 regulates EGFR and Wnt signaling pathways and is a promising target for combinatorial treatment of breast cancer**

Samyuktha Suresh, Solène Huard, Amélie Brisson, Fariba Némati, Rayan Dakroub, Coralie Poulard, Mengliang Ye, Elise Martel, Cécile Reyes, David C. Silvestre, Didier Meseure, André Nicolas, David Gentien, Hussein Fayyad-Kazan, Muriel Le Romancer, Didier Decaudin, Sergio Roman-Roman and Thierry Dubois

Correspondence to: [thierry.dubois@curie.fr](mailto:thierry.dubois@curie.fr)

#### **This PDF file includes:**

Supplementary Figures. S1 to S21

#### **Other Supplementary Materials for this manuscript include the following:**

Table S1 [Antibodies, Primers, siRNAs, and Drugs]

Table S2 [Differentially expressed genes in PRMT1-depleted MDA-MB-468 cells]

Table S3 [PRMT1 DNA copy number gain and loss in the curie cohort]

**Figure S1**

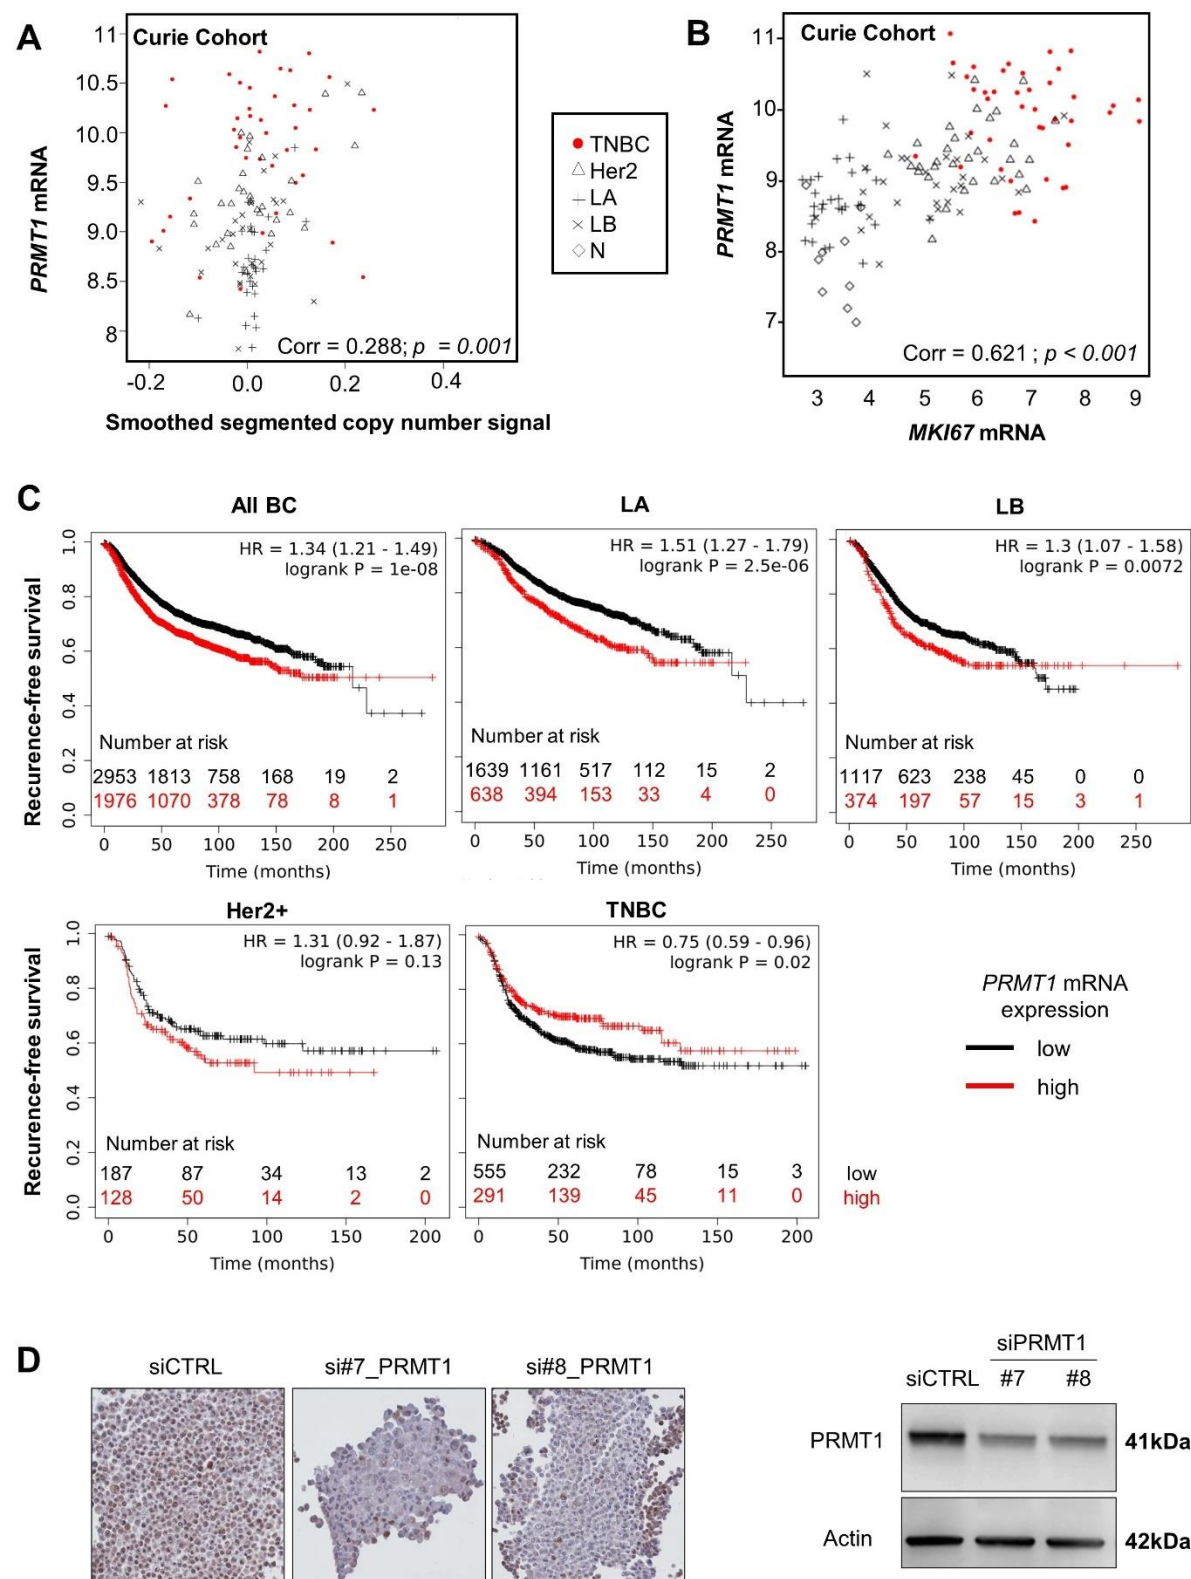

**Figure S1. Correlation and survival analyses and validation of PRMT1 antibody for IHC.** **A**, *PRMT1* mRNA expression correlates with DNA copy number in the whole population of BC in the Curie cohort (Spearman correlation). **B**, *PRMT1* and *MKI67* (proliferative marker) mRNA expression positively correlate in the whole BC population of the Curie cohort (Spearman correlation). **C**, *PRMT1* mRNA expression correlates with prognosis in BC. Recurrence-free survival based on *PRMT1* mRNA expression (Affy probe ID: 206445\_s\_at) was obtained from the Kaplan-Meier (KM) plotter website (<http://kmplot.com>). Best performing cutoff option was used: all BC (n=4929), Luminal B (LB, n=1491), Luminal A (LA, n=2277), Basal for TNBC (TN, n=846), and Her2+ (n=315). Hazard ratio with 95% confidence interval and log-rank p-values were calculated and significance threshold was set at  $p < 0.05$ . Of note, a similar figure plotting *PRMT1* mRNA expression (median cutoff) vs RFS in the whole BC population has been previously published (Liu et al., 2019, "Methylation of C/EBP $\alpha$  by PRMT1 Inhibits Its Tumor-Suppressive Function in Breast Cancer", *Cancer Res.* DOI: 10.1158/0008-5472.CAN-18-3211) but with a lower number of samples (4929 in our study compared to 3951 in their article). **D**, Validation of PRMT1 antibody for IHC staining. Left panel, PRMT1 antibody used for IHC (Fig. 1C) was validated using AFA-fixed cell pellets from MDA-MB-468 cells treated with control siRNA (CTRL) or two siRNAs targeting PRMT1 for 72 h (#7, #8). Right panel, PRMT1 depletion was verified by western blotting using an anti-PRMT1 antibody. Anti-actin antibody was used as a loading control.

**Figure S2**

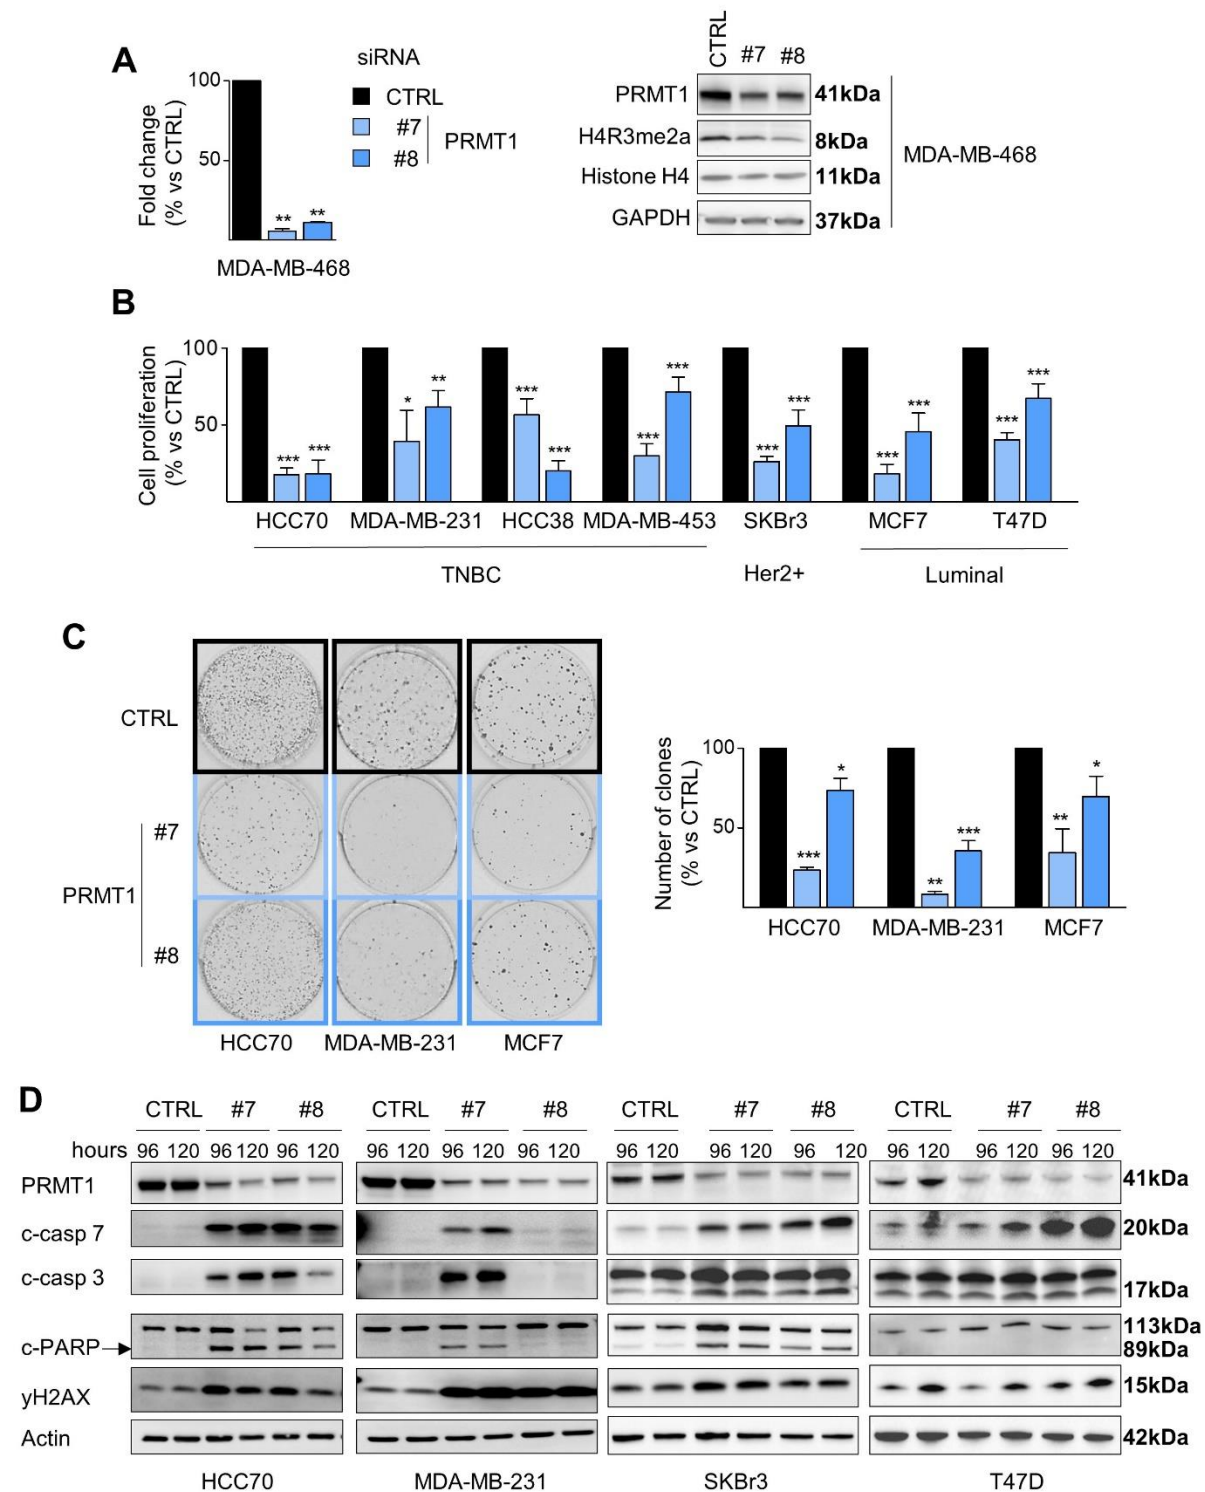

**Figure S2. PRMT1 depletion decreases cell viability, colony forming ability and induces apoptosis in various BC cell lines.**

**A**, Validation of PRMT1 siRNAs. MDA-MB-468 cells were treated with control (CTRL, black) or two PRMT1 (#7, #8, blue) siRNA for 48h. PRMT1 expression was detected at the mRNA (by RTqPCR, normalization by actin; left panel) and protein (by western blotting, right panel) levels. The methylation of histone H4 on Arg 3 (H4R3me2a) was used to measure PRMT1 activity and anti-histone H4 and anti-GAPDH antibodies were used as loading controls. **B**, PRMT1 depletion decreases the viability of BC cells. TNBC, Her2+, and luminal cells were transfected with control (CTRL, black) or two PRMT1 (#7, #8, blue) siRNAs for 144h and cell viability was measured by an MTT or WST1 assay. **C**, PRMT1 depletion decreases colony formation. TNBC and luminal cells were transfected with control (CTRL, black) or two PRMT1 (#7, #8, blue) siRNAs, and then cultured on plastic for 6 mitotic cycles equivalent to 14 (HCC70), 7 (MDA-MB-231) or 12 (MCF7) days. A representative image (left panel) and the quantifications (right panel) are shown. **D**, PRMT1 depletion induces apoptosis in BC cells. TNBC, Her2+ and luminal cells were transfected with control (CTRL) or two PRMT1 (#7, #8) siRNA for 96h or 120h. Apoptosis was detected by western blotting using antibodies recognizing the cleaved forms of caspase 7 (c-casp 7), caspase 3 (c-casp 3) and PARP (c-PARP). DNA damage was detected using an anti- $\gamma$ H2AX antibody. Anti-actin antibody was used as a loading control. The arrow indicates the cleaved form of PARP, while the upper band corresponds to total PARP protein. Results are presented as the percentage (B, C) or percent fold change (A) relative to control cells (CTRL). All data are expressed as the mean  $\pm$  SD from at least three independent experiments (A, B, C). Pictures are from a single experiment, representative of three independent experiments (A, C, D). P-values from a Student t-test are represented as \* $p < 0.05$ ; \*\* $p < 0.01$ ; \*\*\* $p < 0.001$ .

**Figure S3**

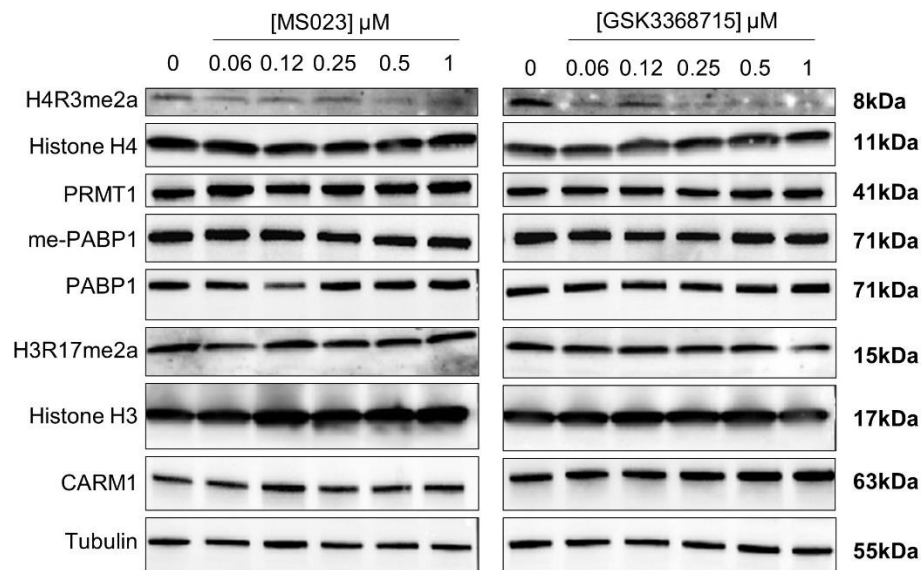

**Figure S3. Type I PRMT inhibitors decrease PRMT1 but not CARM1 and PRMT6 activity under the tested conditions.**

MDA-MB-468 cells were treated with varying concentrations of MS023 or GSK3368715 for 48h. PRMT1 inhibition was assessed by western blotting using anti-H4R3me2a antibody. Methylation of PABP1 (me-PABP1) was used to measure CARM1 activity and histone H3 methylation (H3R17me2a) to assess CARM1 and PRMT6 activities. Anti-PABP1, histone H3, CARM1, and tubulin antibodies were used as loading controls.



**Figure S4**

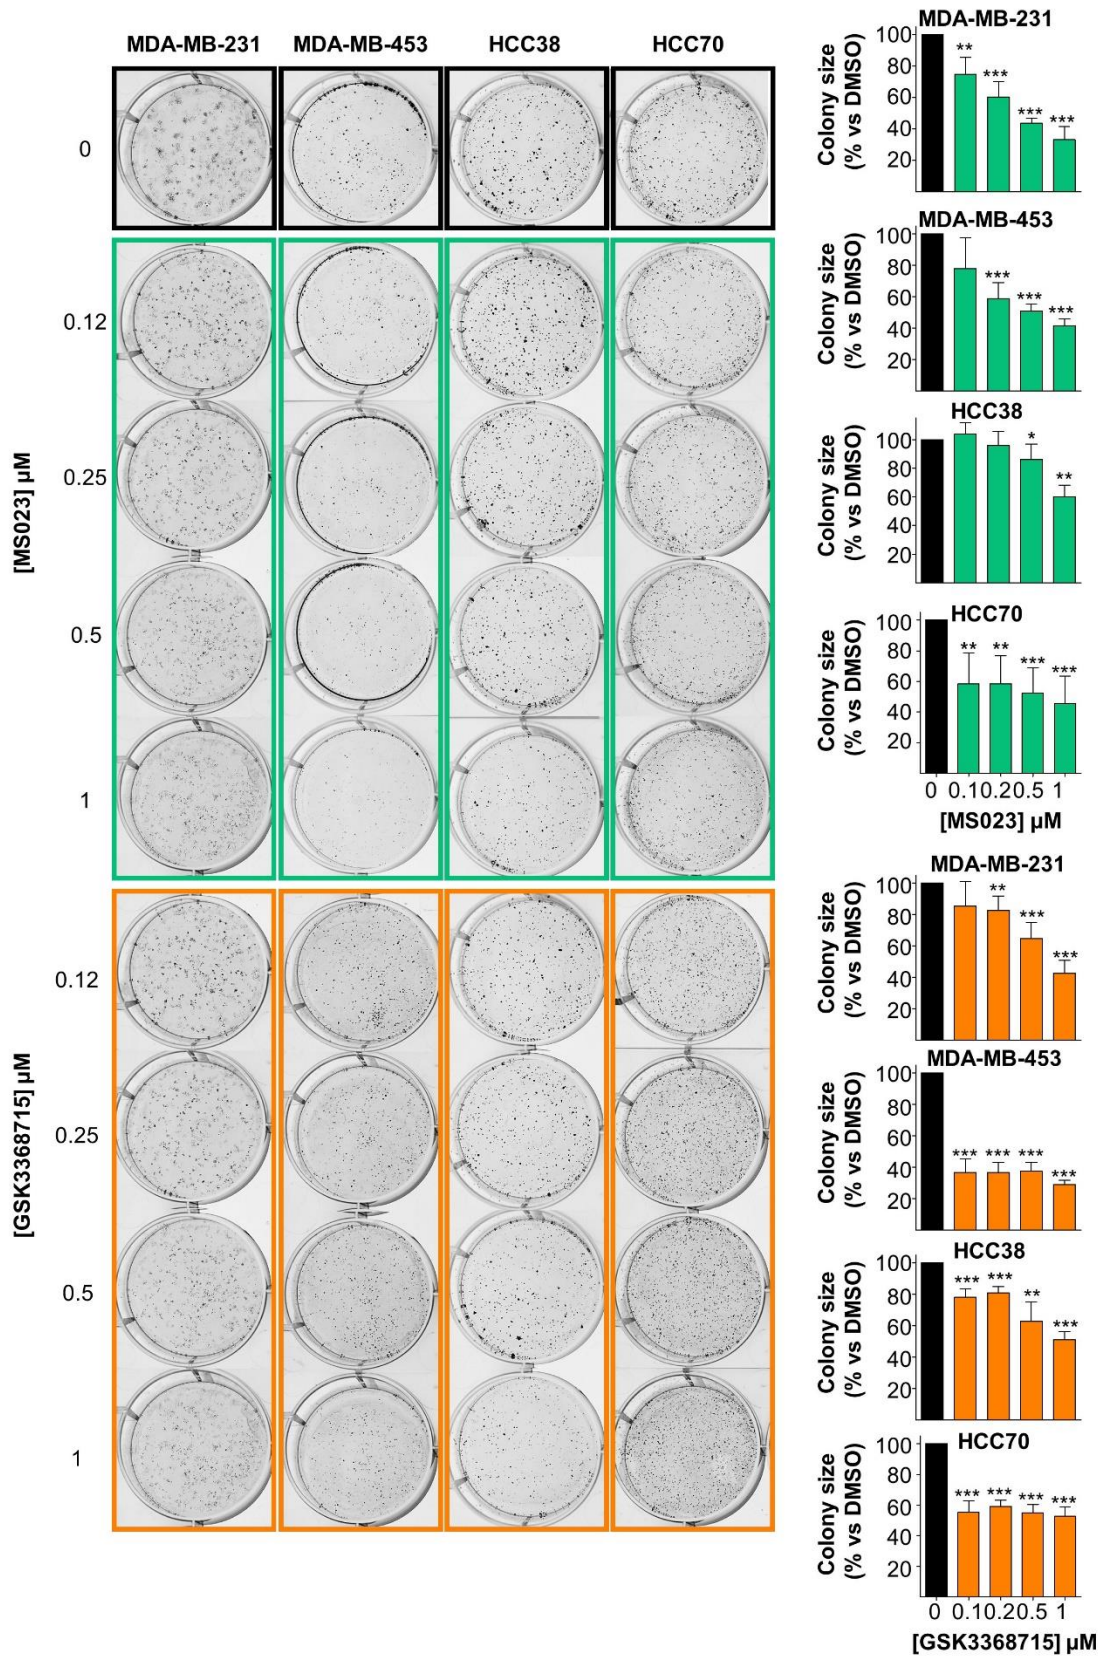

**Figure S4. Type I PRMT inhibitors decrease colony size in TNBC cells.**

MDA-MB-231, MDA-MB-453, HCC38, and HCC70 cells were cultured on plastic for 7 (MDA-MB-231) or 14 (MDA-MB-453, HCC38, and HCC70) days after MS023 (green) or GSK3368715 (orange) treatment. The quantification of colony size is expressed as a percentage relative to DMSO-treated cells (black), represented as the mean  $\pm$  SD from two independent experiments performed in triplicates. P-values are from a Student t-test and represented as \* $p < 0.05$ ; \*\* $p < 0.01$ ; \*\*\* $p < 0.001$ .



**Figure S5**

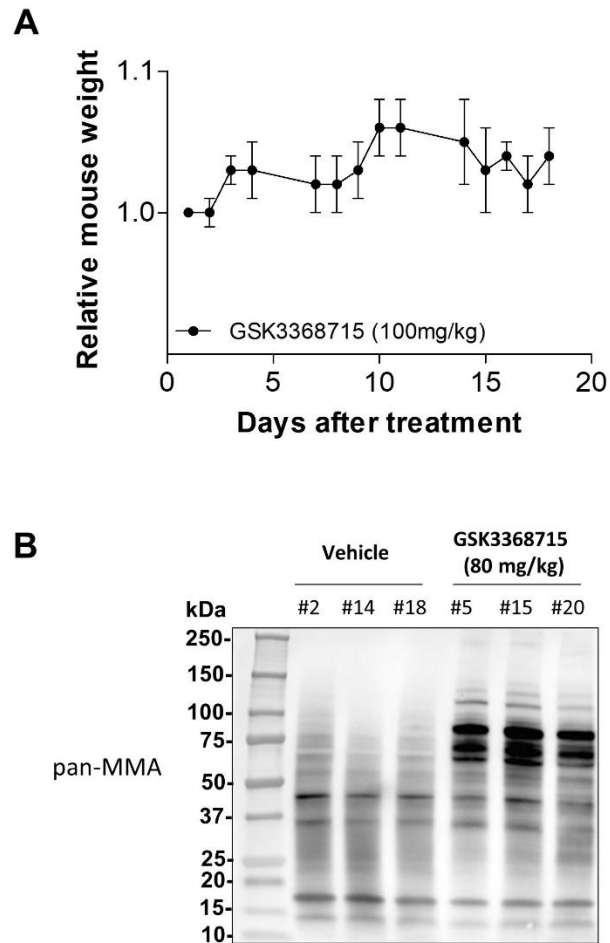

**Figure S5. GSK3368715 treatment shows no toxicity and increases global monomethylation in mice.**

**A**, GSK3368715 treatment is not toxic for mice at the tested dose. GSK3368715 was administered in Swiss-nude mice (n=3) at 100 mg/kg per-os, once daily for 18 days. Treatment was not associated with any mortality or body weight loss during this period.

**B**, GSK3368715 treatment (80 mg/kg) increases global monomethylation, *in vivo*. Total monomethylation was detected by western blotting using anti-pan monomethylated (pan-MMA) antibodies in the tumors excised from 3 vehicle (#2, #14, #18)- or GSK3368715 (#5, #15, #20)-treated mice at the end of the experiment.

Figure S6

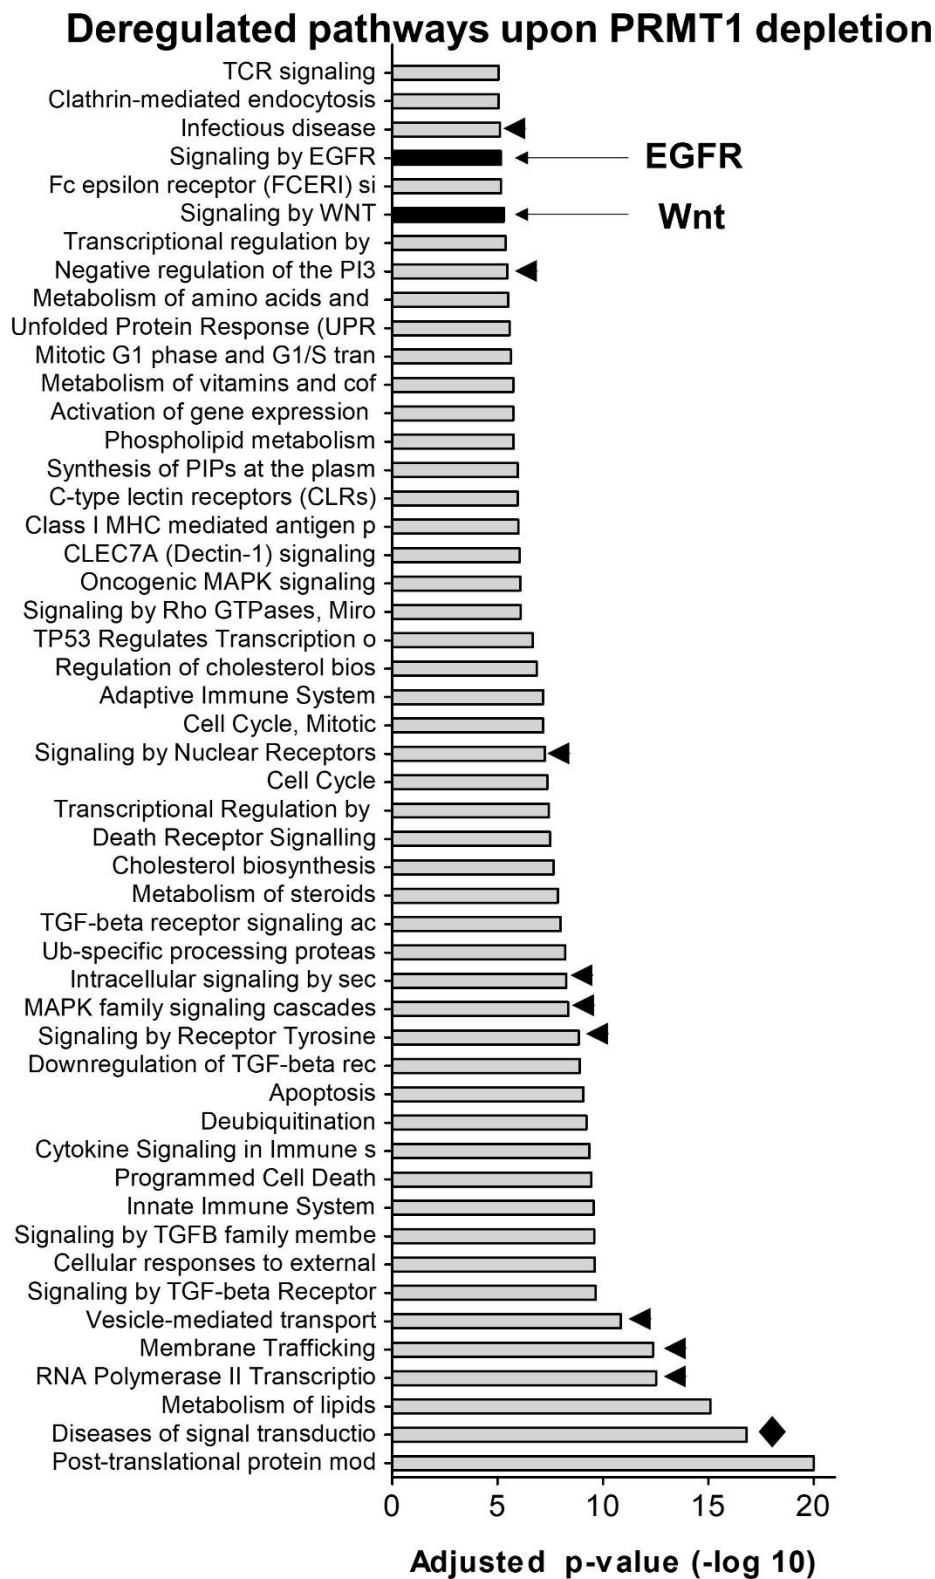

**Figure S6. PRMT1 regulates EGFR and Wnt signaling pathways.**

RNA was extracted from MDA-MB-468 cells transfected with control or PRMT1 (#7, #8) siRNA for 24h and 48h, and analyzed by Affymetrix microarray. Gene enrichment pathway analysis, using the REACTOME database, was performed on the deregulated genes common to both PRMT1 siRNAs. The top 50 deregulated pathways ranked according to their significance (adjusted p-values) is shown. The EGFR and Wnt signalling pathways are highlighted in black. Arrowheads point to pathways including *EGFR*, and diamond points to pathways including *EGFR*, *LRP5* and *PORCN*.

Figure S7

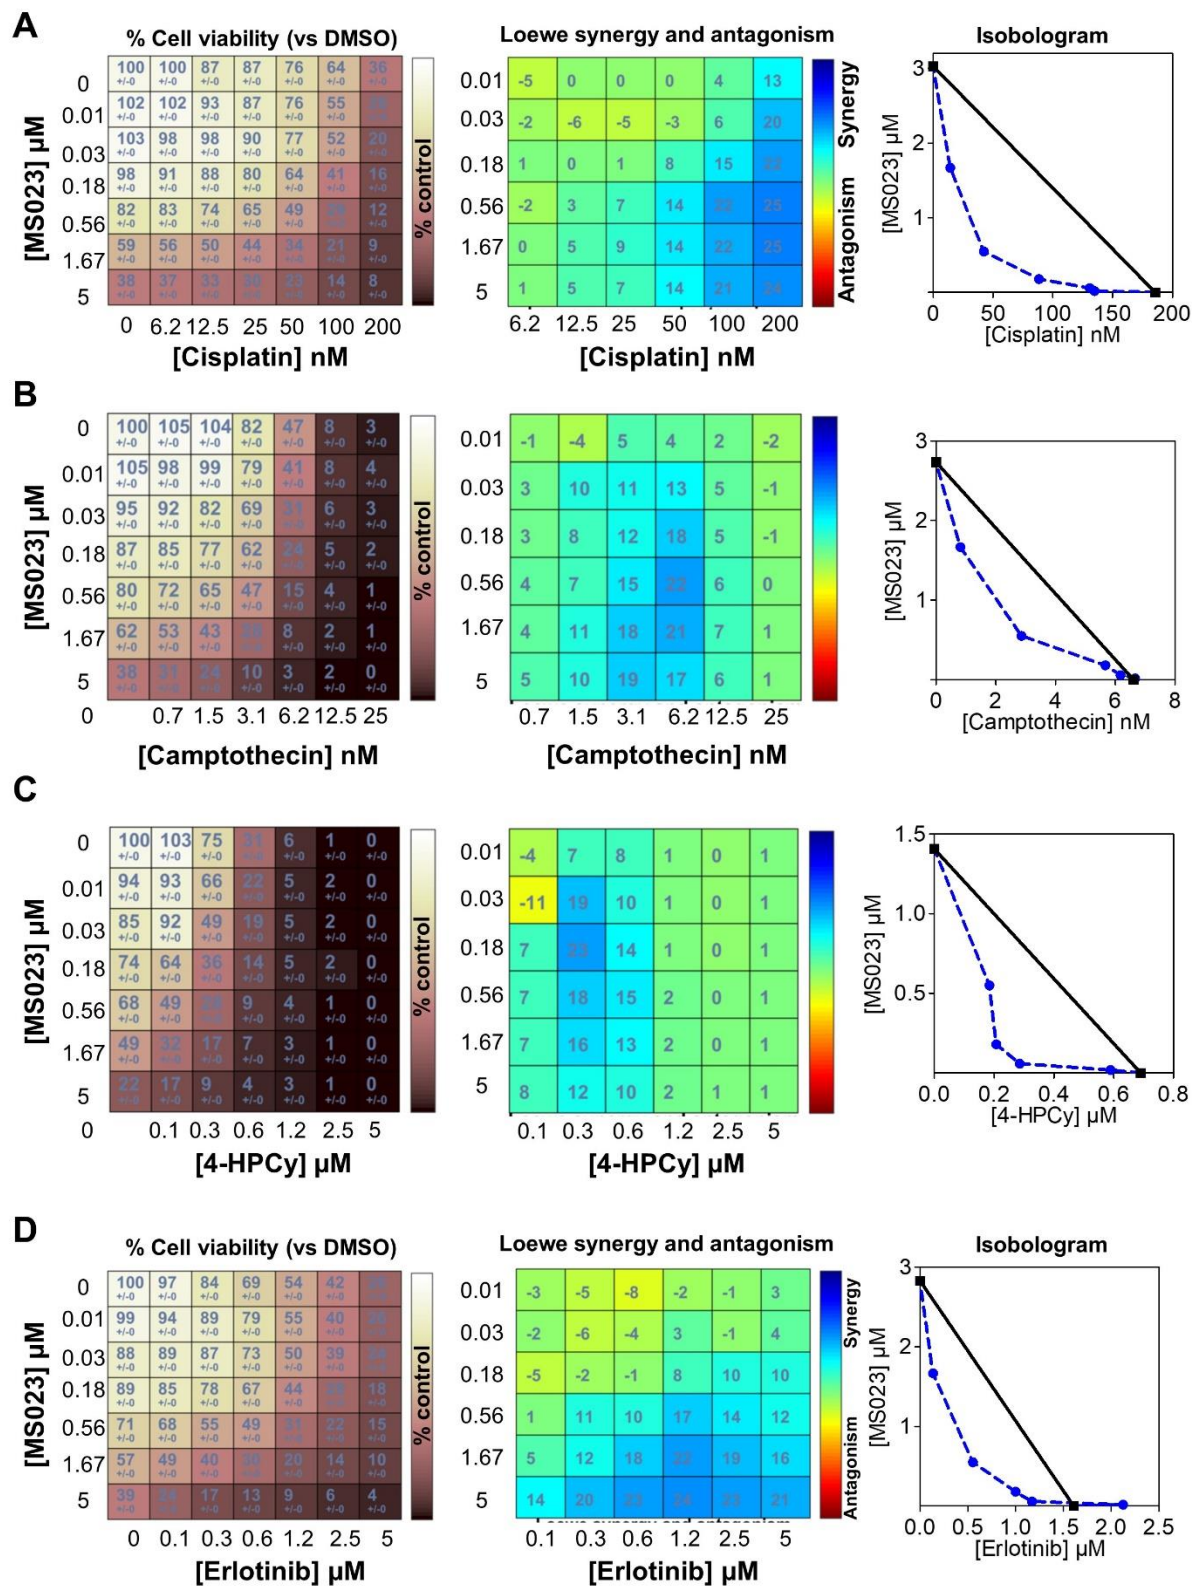

**Figure S7. Synergistic interactions between MS023 (a type I PRMT inhibitor) and chemotherapies (A, B, C) or erlotinib (D).**

MDA-MB-468 cells were seeded in 96-well plates, treated with the indicated drugs for 7 days (equivalent to 4 doubling times), and cell viability was measured by CellTiterGlo assay. MS023 was serially diluted three-fold and cisplatin (A), camptothecin (B), 4-hydroperoxy cyclophosphamide (4-HPCy; C), erlotinib (D) were serially diluted two-fold (concentrations indicated in the Figure). The drug interactions were calculated using the Loewe model on the Combenefit software. Cell viability (% compared to DMSO-treated cells, left panel), synergy matrix as calculated using the Loewe excess model (middle panel), and isobolograms (right panel) for each drug pair are indicated. Presented data are representative of three independent experiments.

Figure S8

A

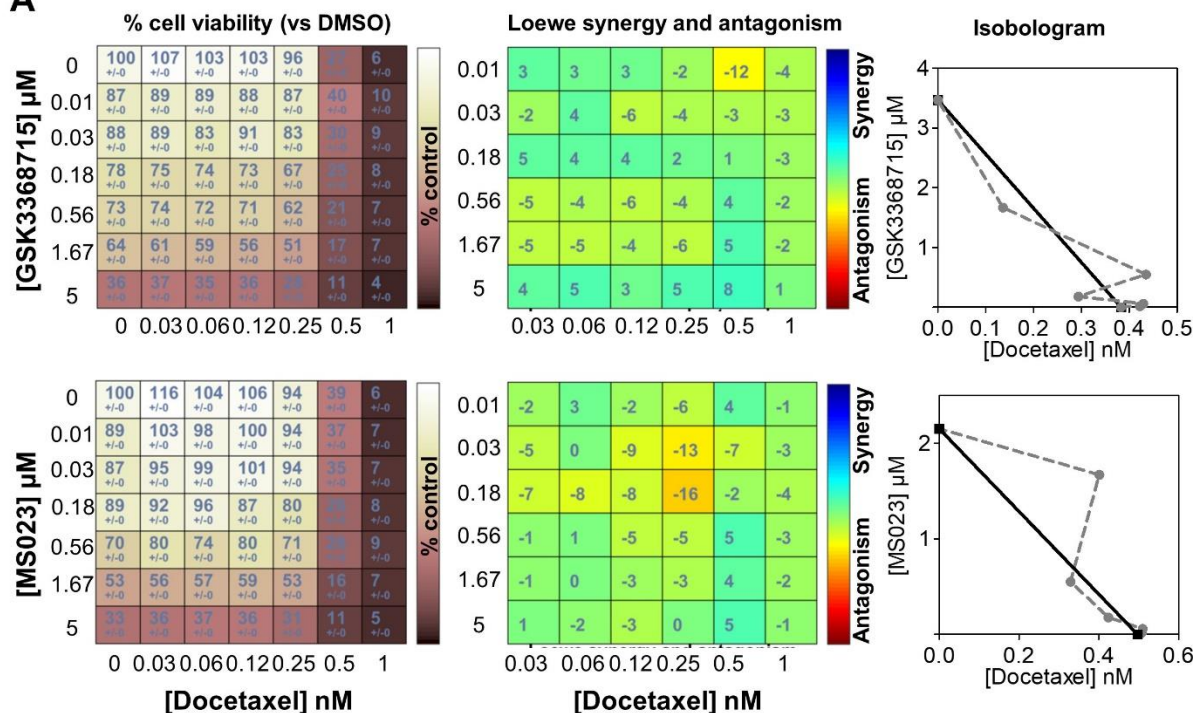

B

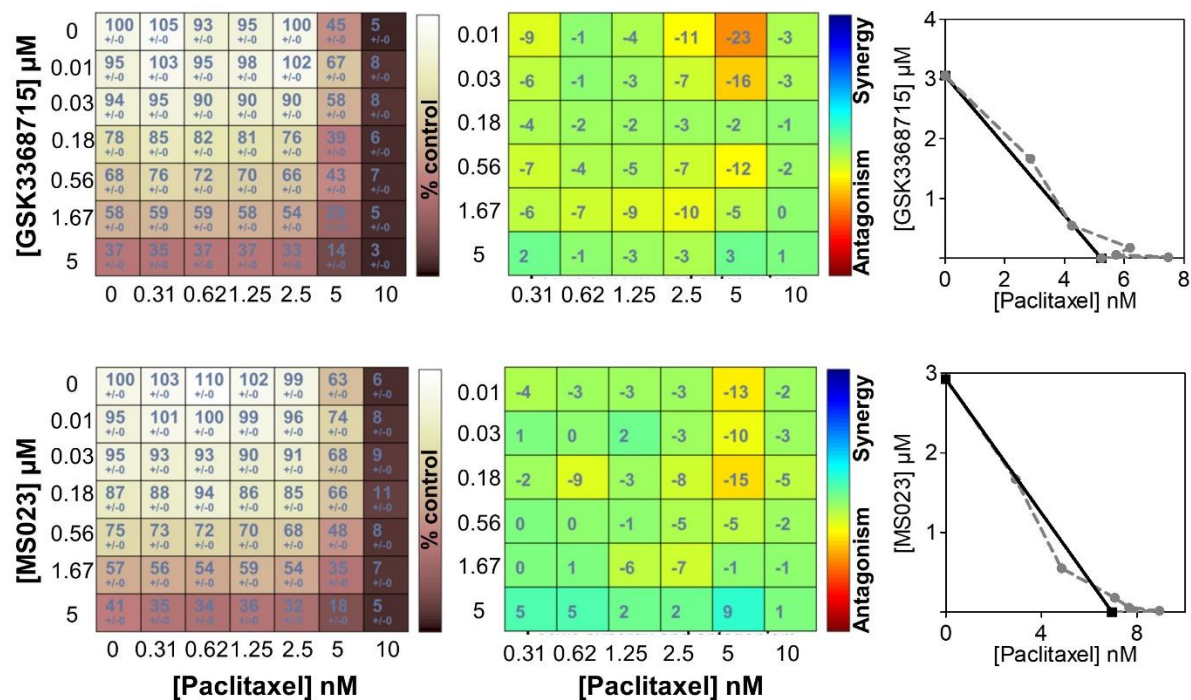

**Figure S8. Additive interactions between Type I PRMT inhibitors and taxanes.**

**A and B,** MDA-MB-468 cells were seeded in 96-well plates, treated with the indicated drugs for 7 days (equivalent to 4 doubling times) and cell viability was measured by CellTiterglo assay. Type I PRMT inhibitors (MS023, GSK3368715) were serially diluted three-fold and docetaxel (A) or paclitaxel (B) were serially diluted two-fold (concentrations indicated in the figure). The drug interactions were calculated using the Loewe model on the Combenefit software. Cell viability (% compared to DMSO-treated cells, left panel), synergy matrix as calculated using the Loewe excess model (middle panel), and isobolograms (right panel) for each drug pair are indicated. Presented data are representative of three independent experiments.



Figure S9

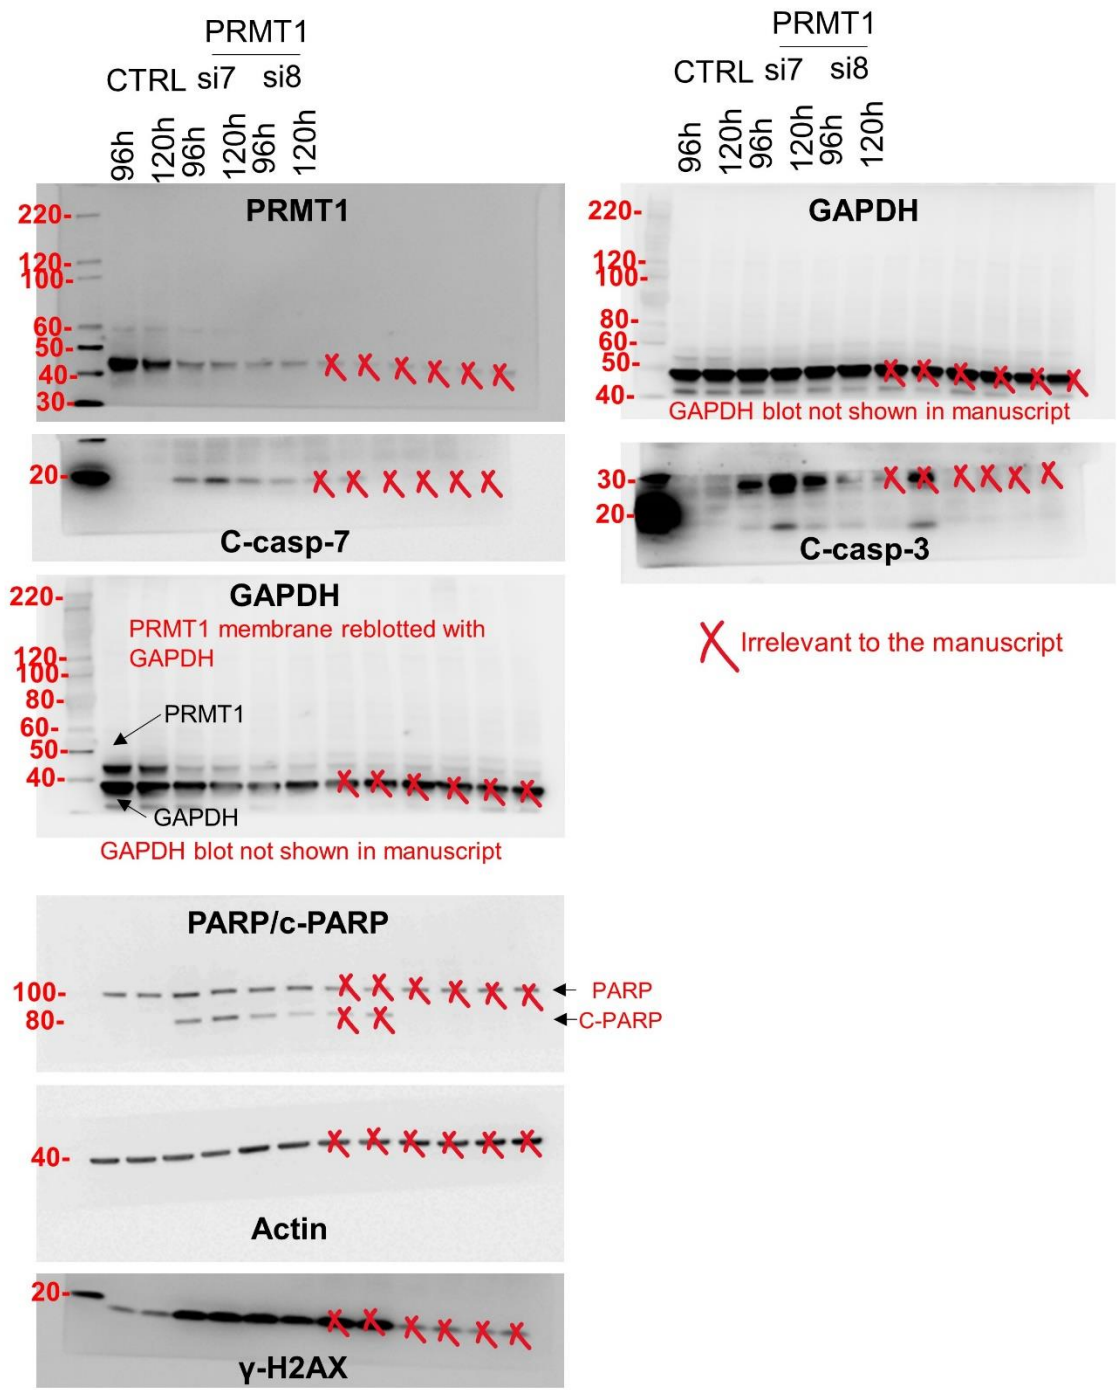

Figure S9. Uncropped original blots of Figure 2D.

**Figure S10**

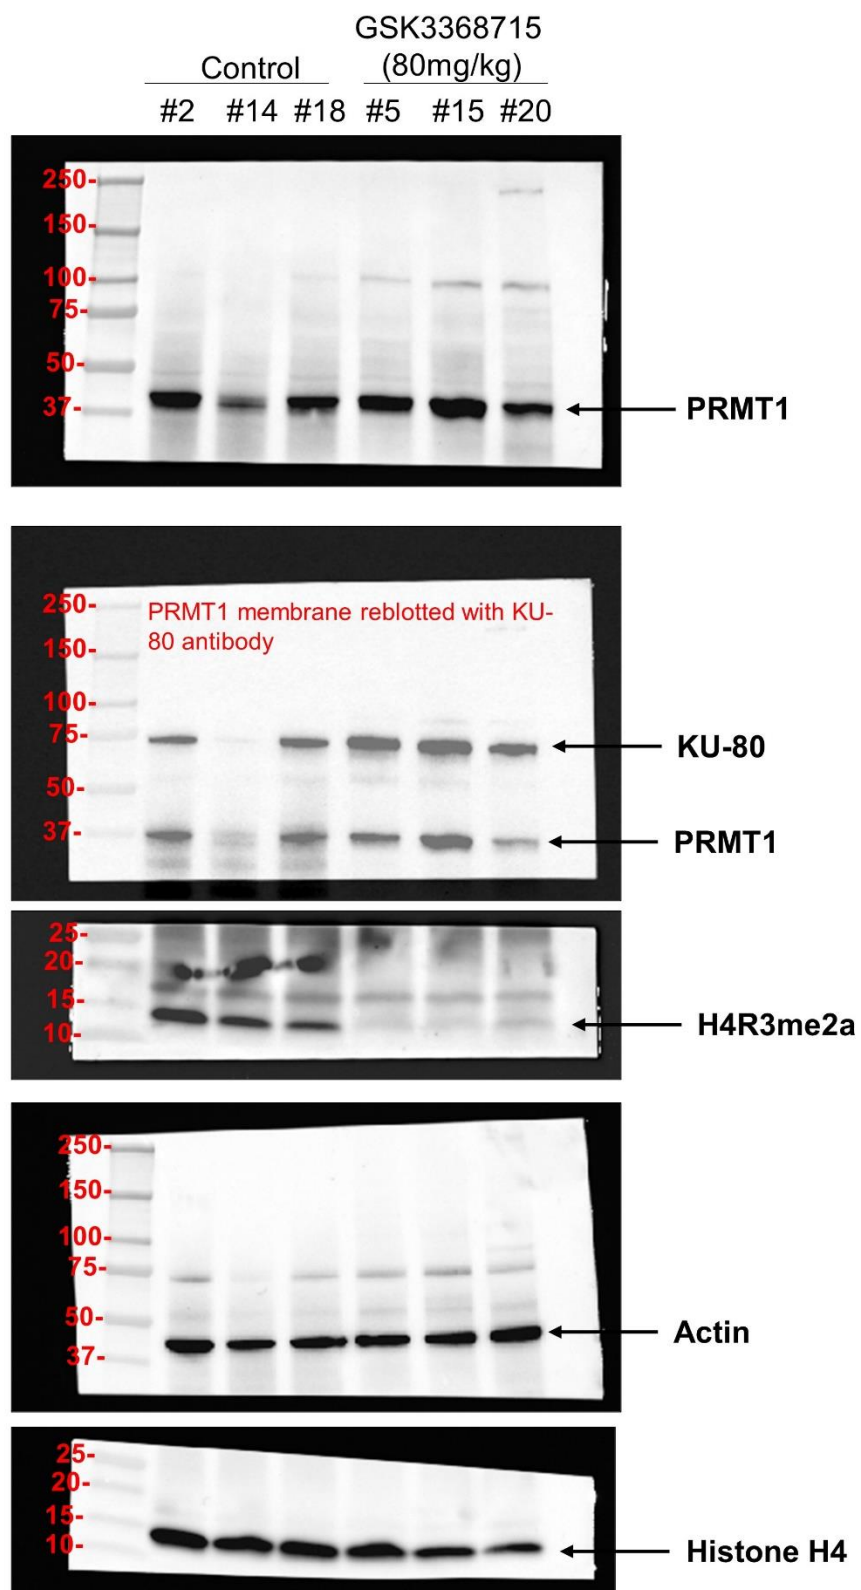

**Figure S10. Uncropped original blots of Figure 3D.**

**Figure S11**

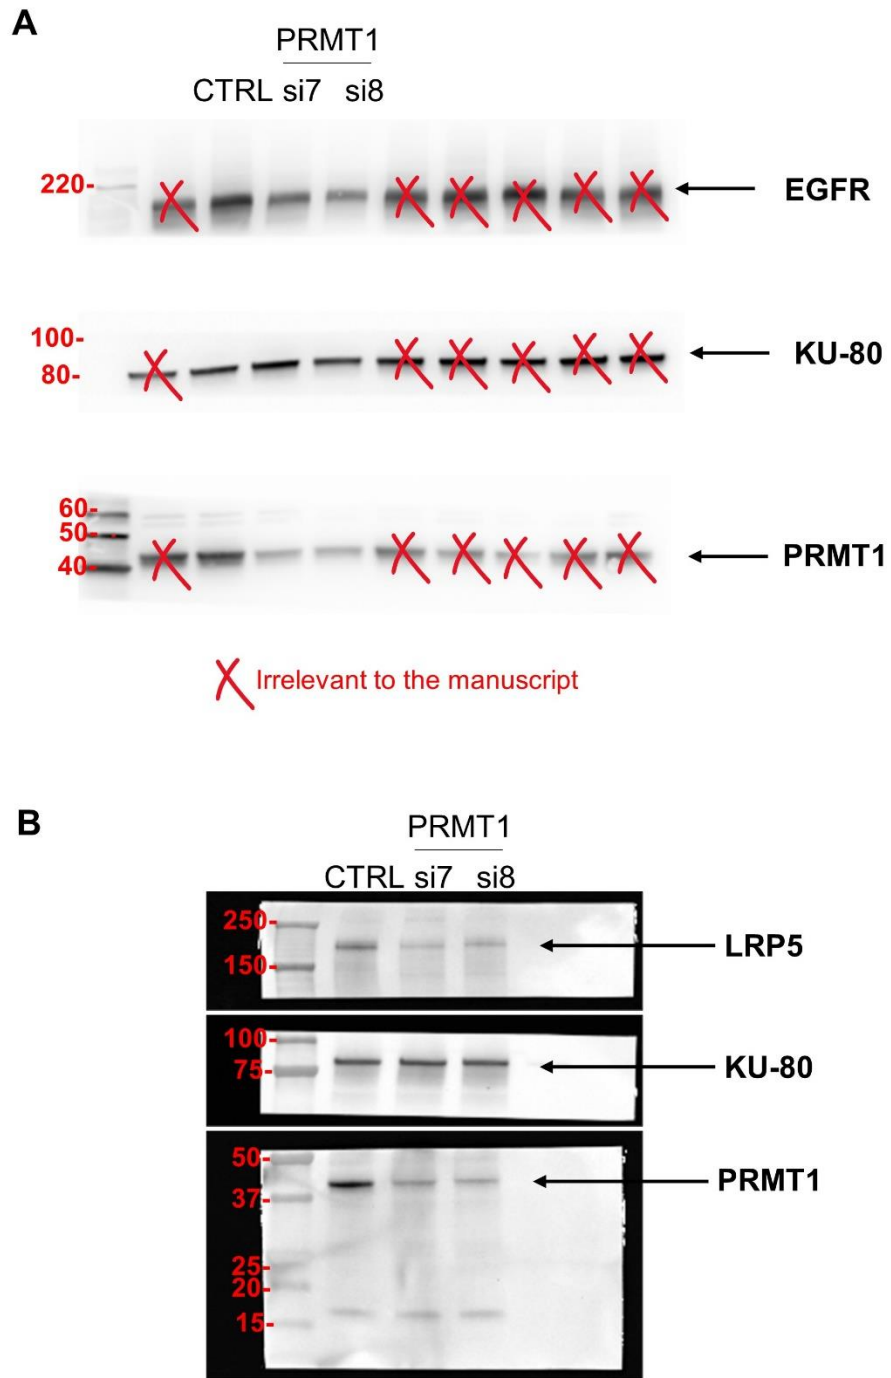

**Figure S11. A, uncropped original blots of Figure 4D. B, uncropped original blots of Figure 4H.**

**Figure S12**

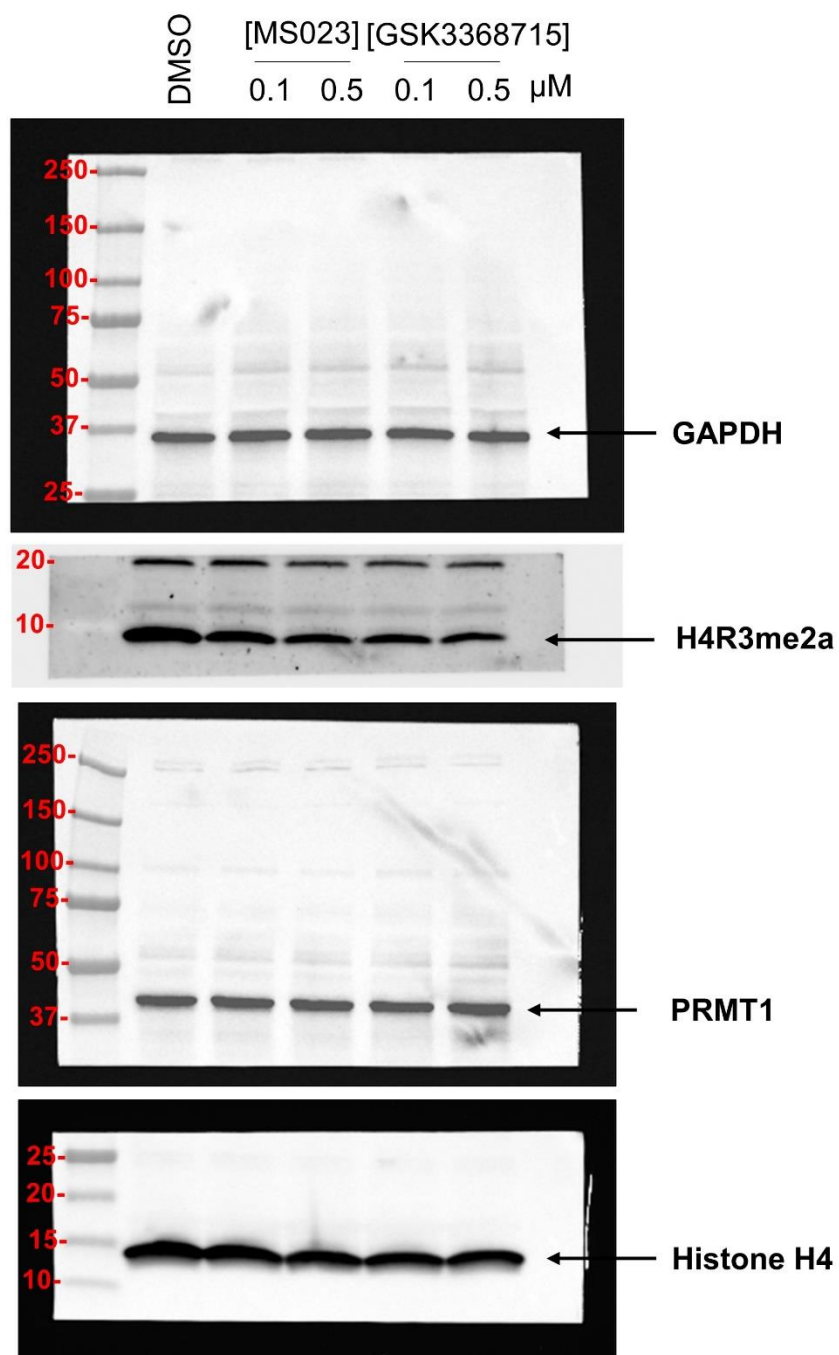

**Figure S12. Uncropped original blots of Figure 5D.**

**Figure S13**

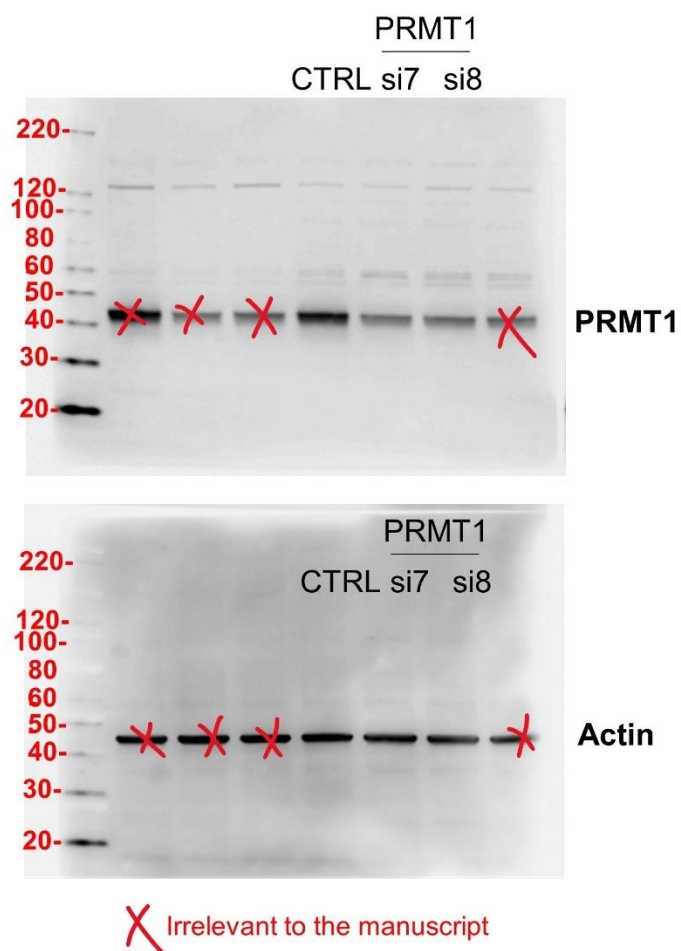

**Figure S13. Uncropped original blots of Figure S1D.**

**Figure S14**

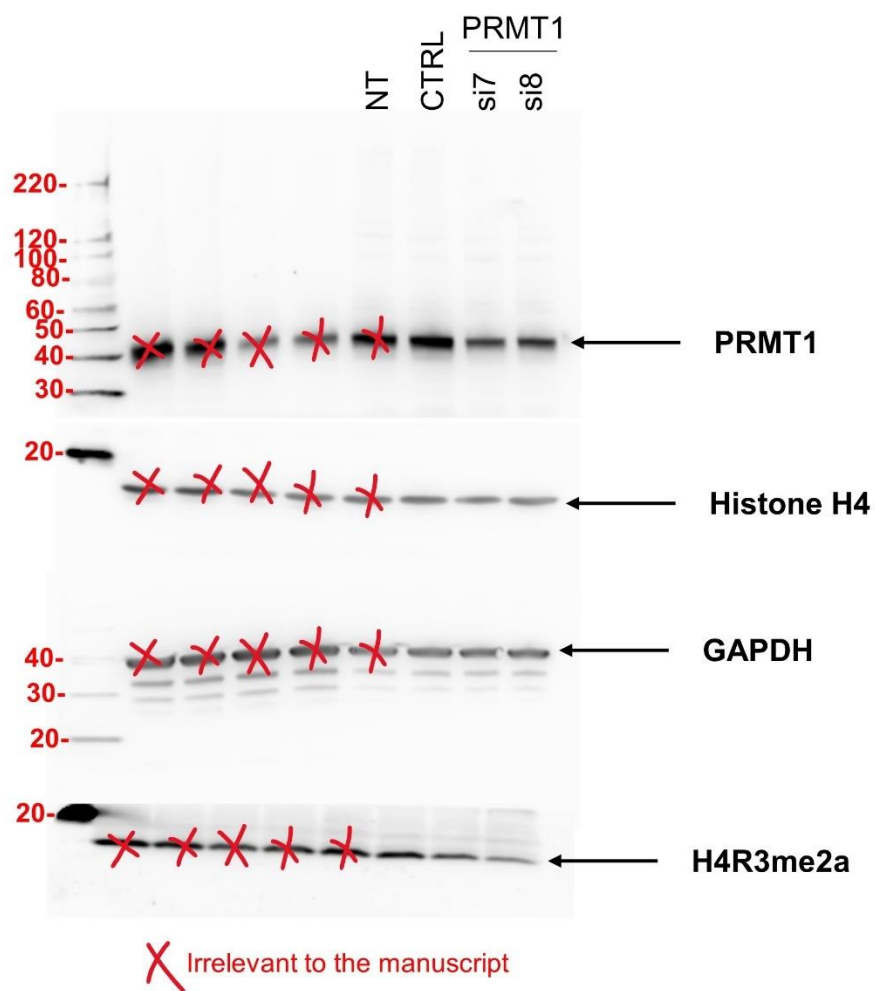

**Figure S14. Uncropped original blots of Figure S2A. NT- non treated**

Figure S15

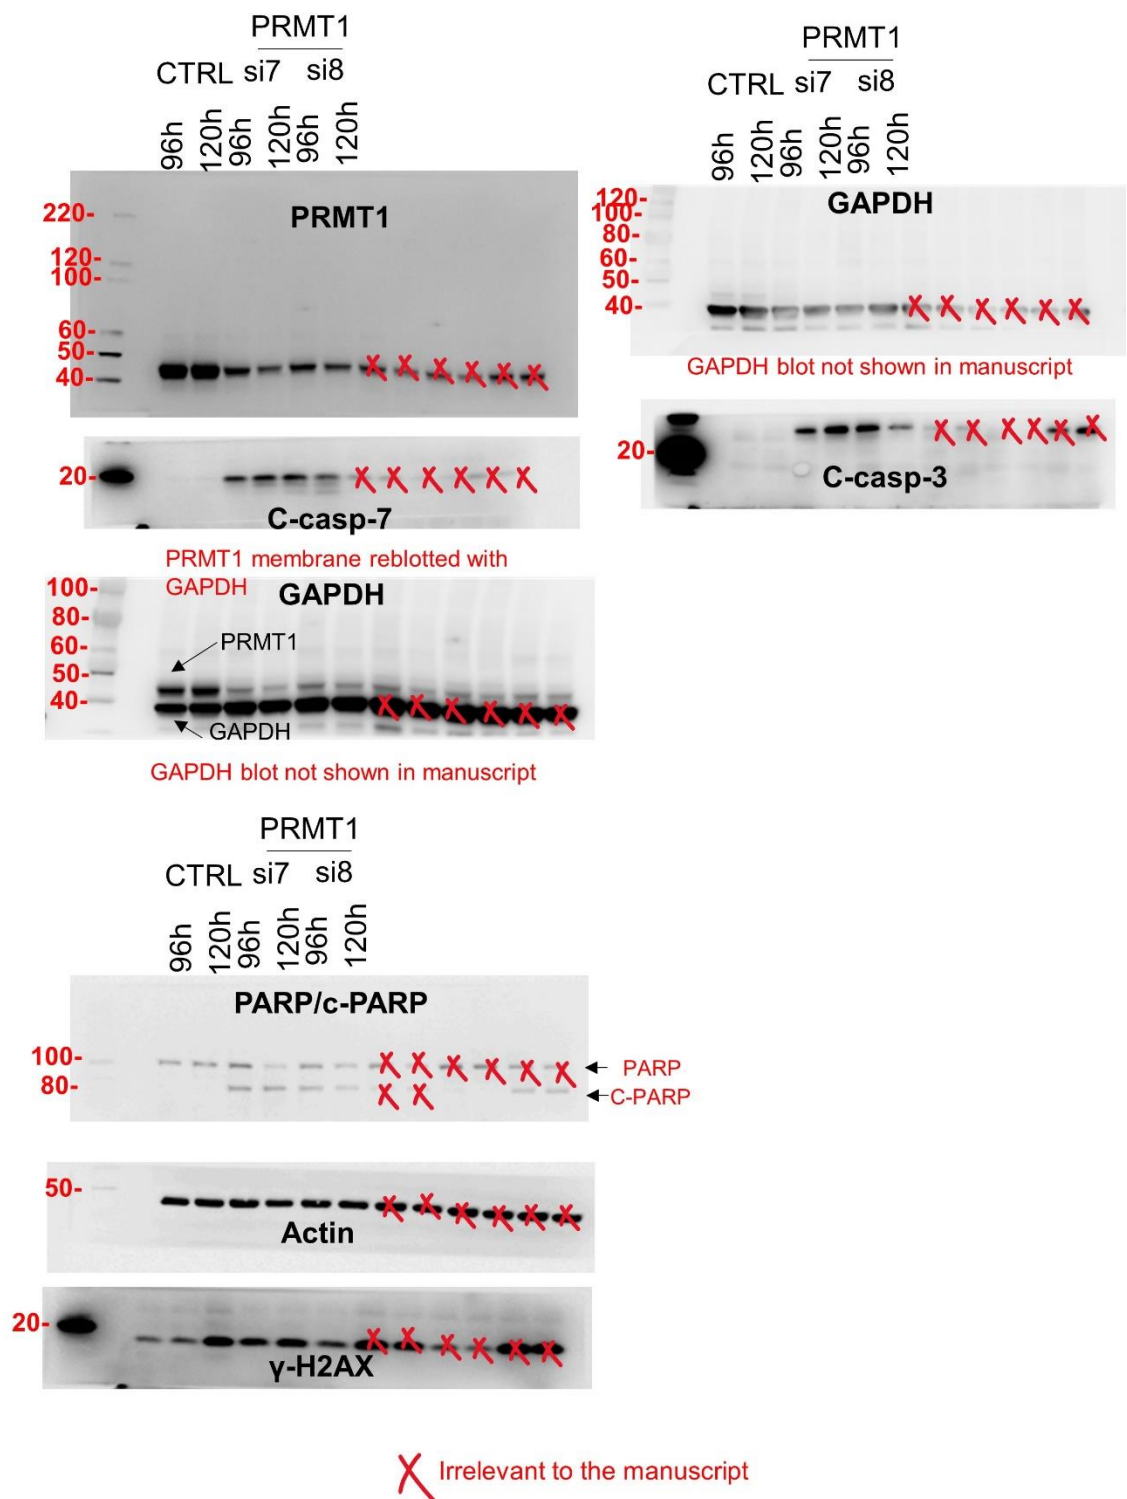

Figure S15. Uncropped original blots of Figure S2D for HCC70 cell line.



Figure S16

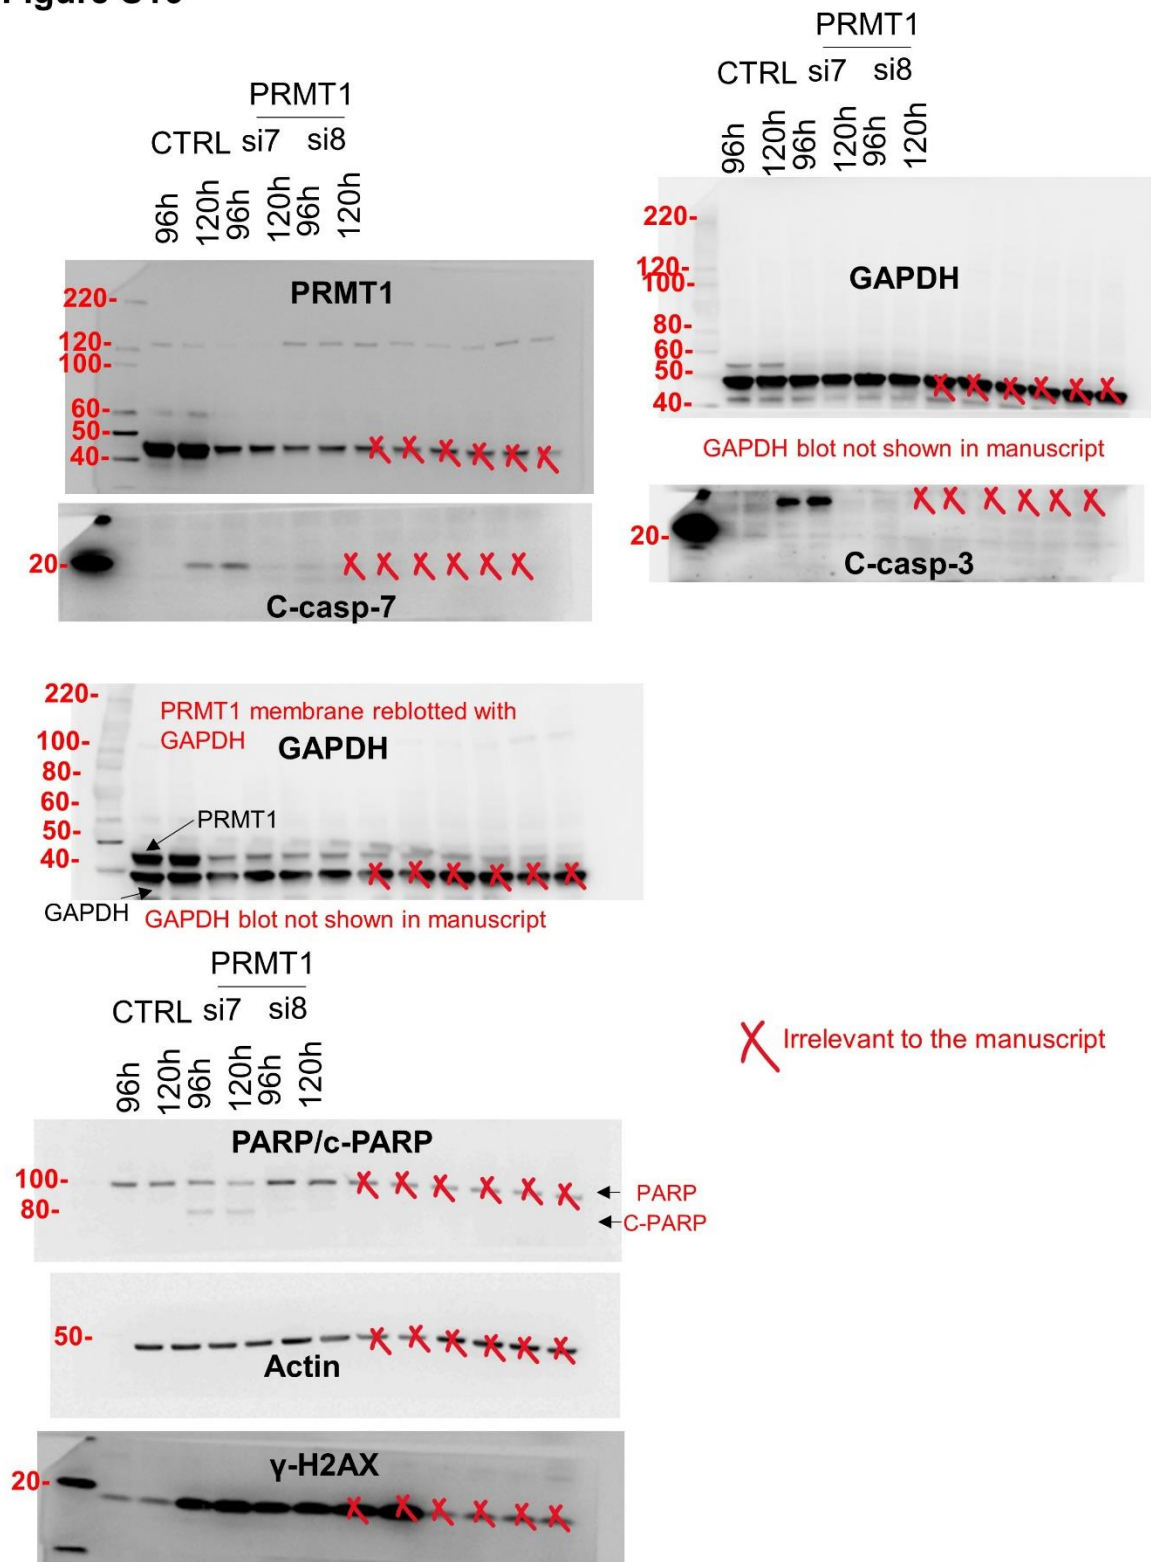

Figure S16. Uncropped original blots of Figure S2D for MDA-MB-231 cell line.

**Figure S17**

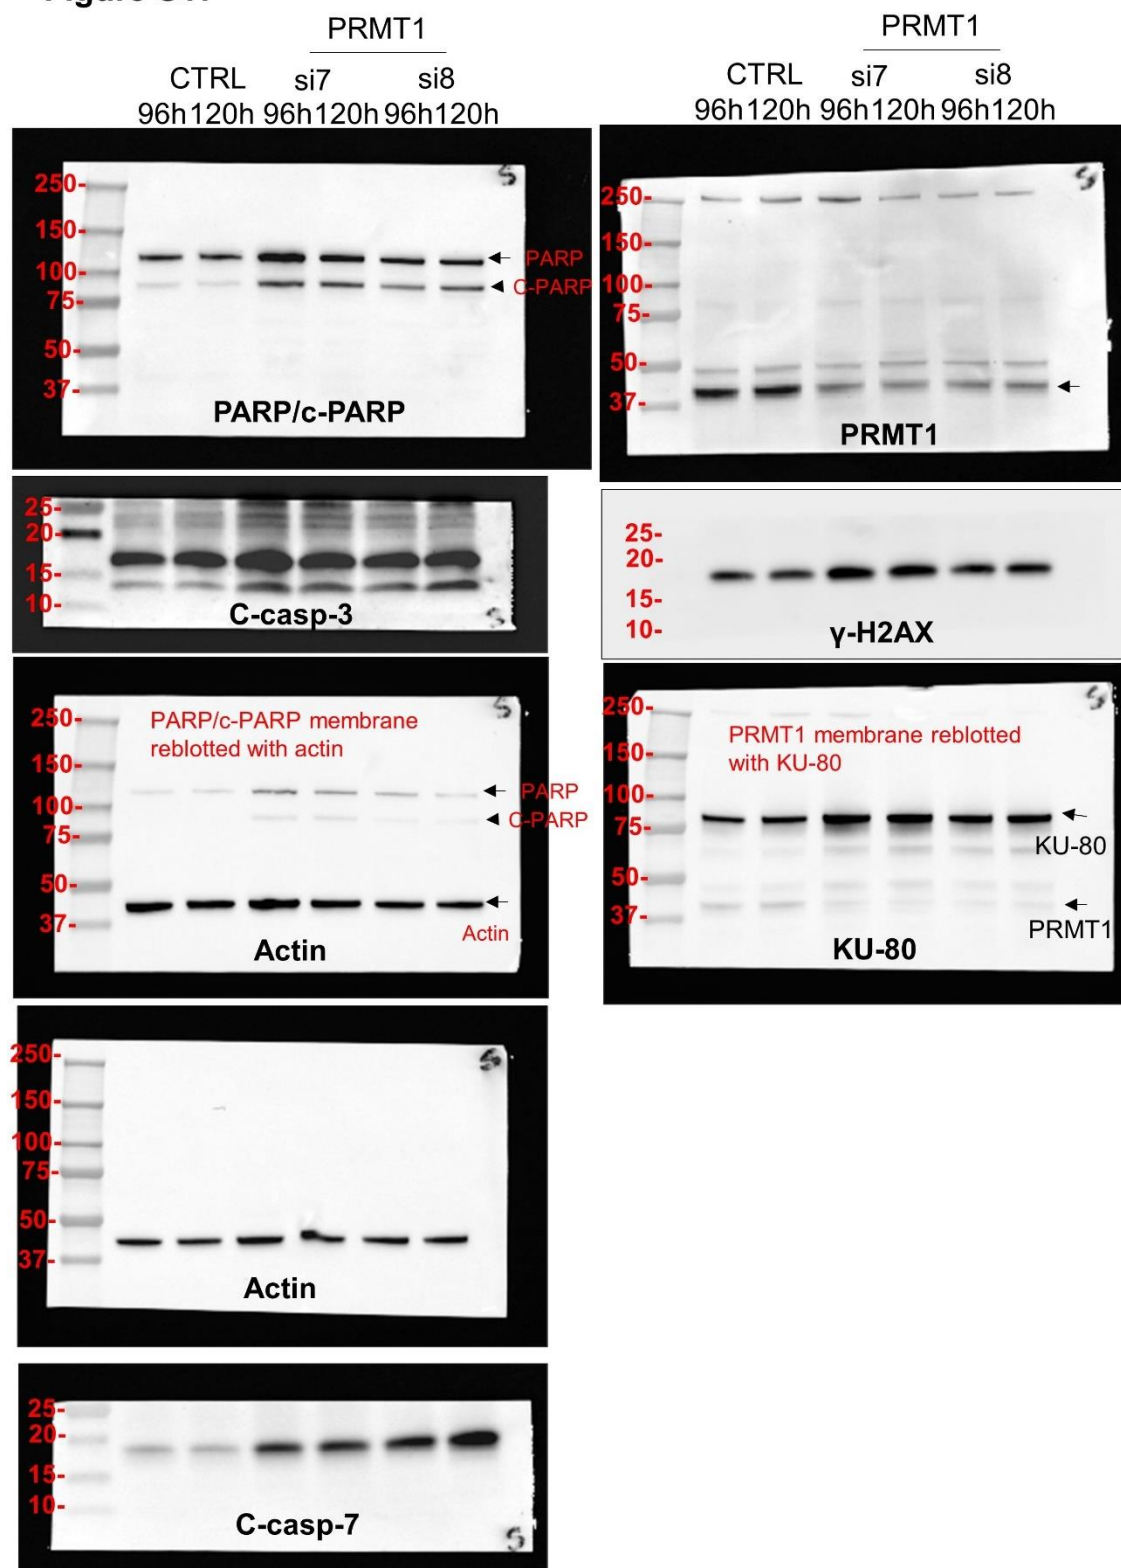

**Figure S17. Uncropped original blots of Figure S2D for SKBr3 cell line.**

**Figure S18**

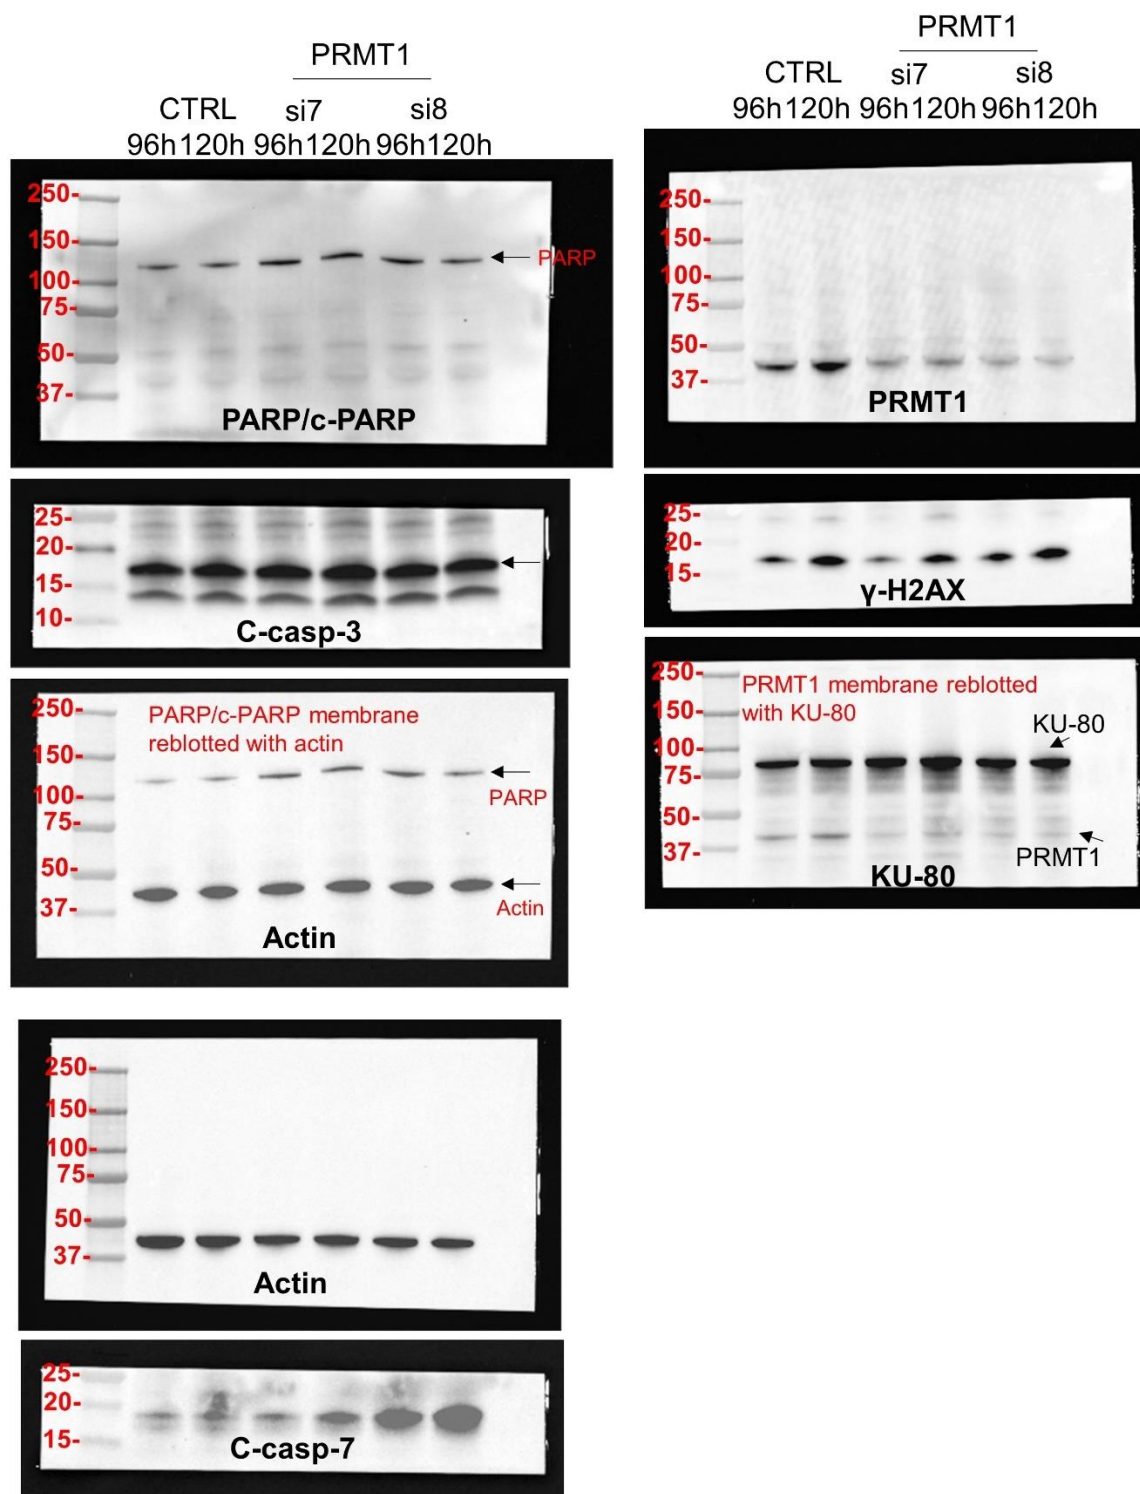

**Figure S18. Uncropped original blots of Figure S2D for T47D cell line.**

Figure S19

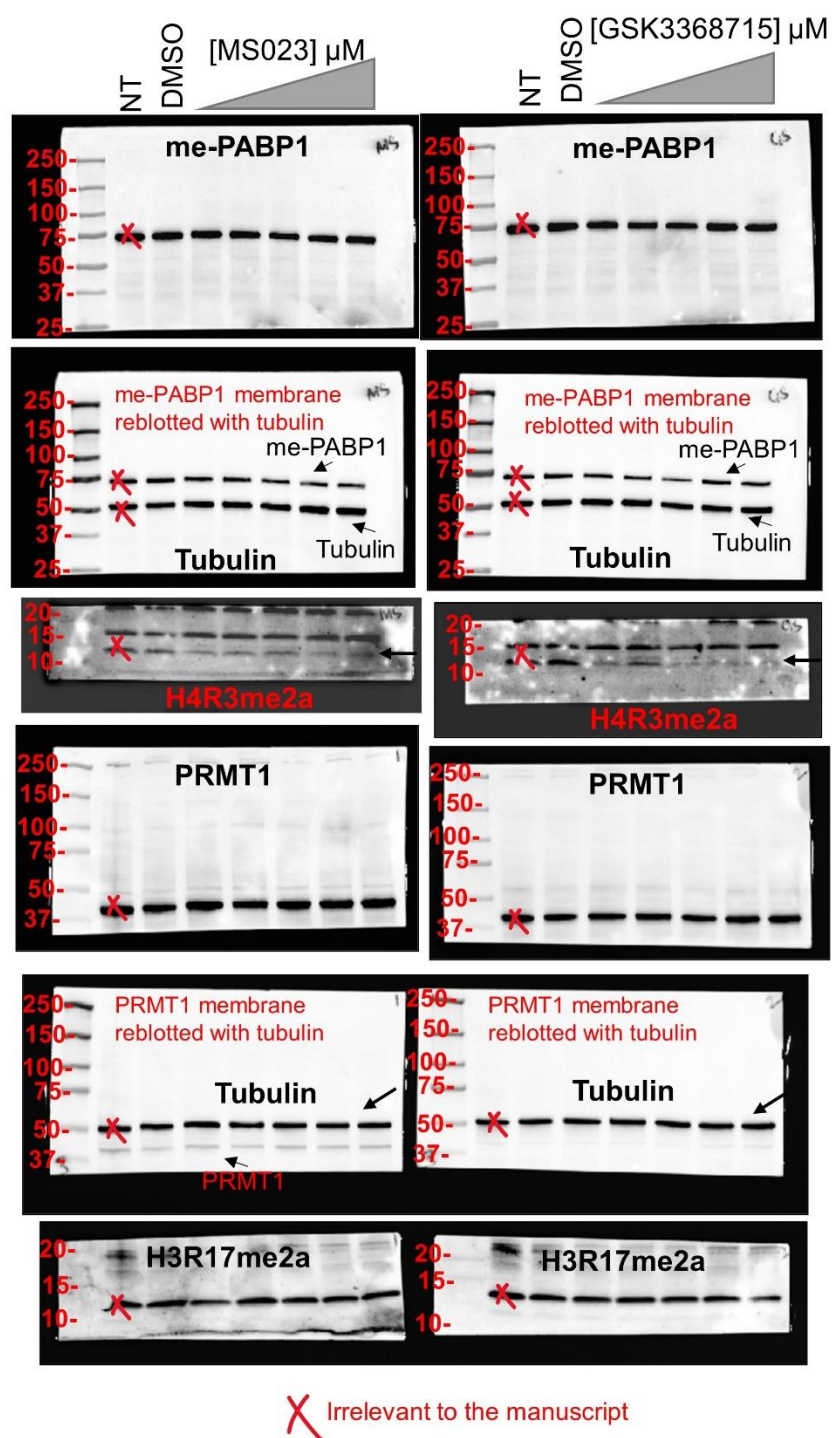

Figure S19. Uncropped original blots of Figure S3 (for remaining blots, see Figure S20). NT- non treated.



**Figure S20**

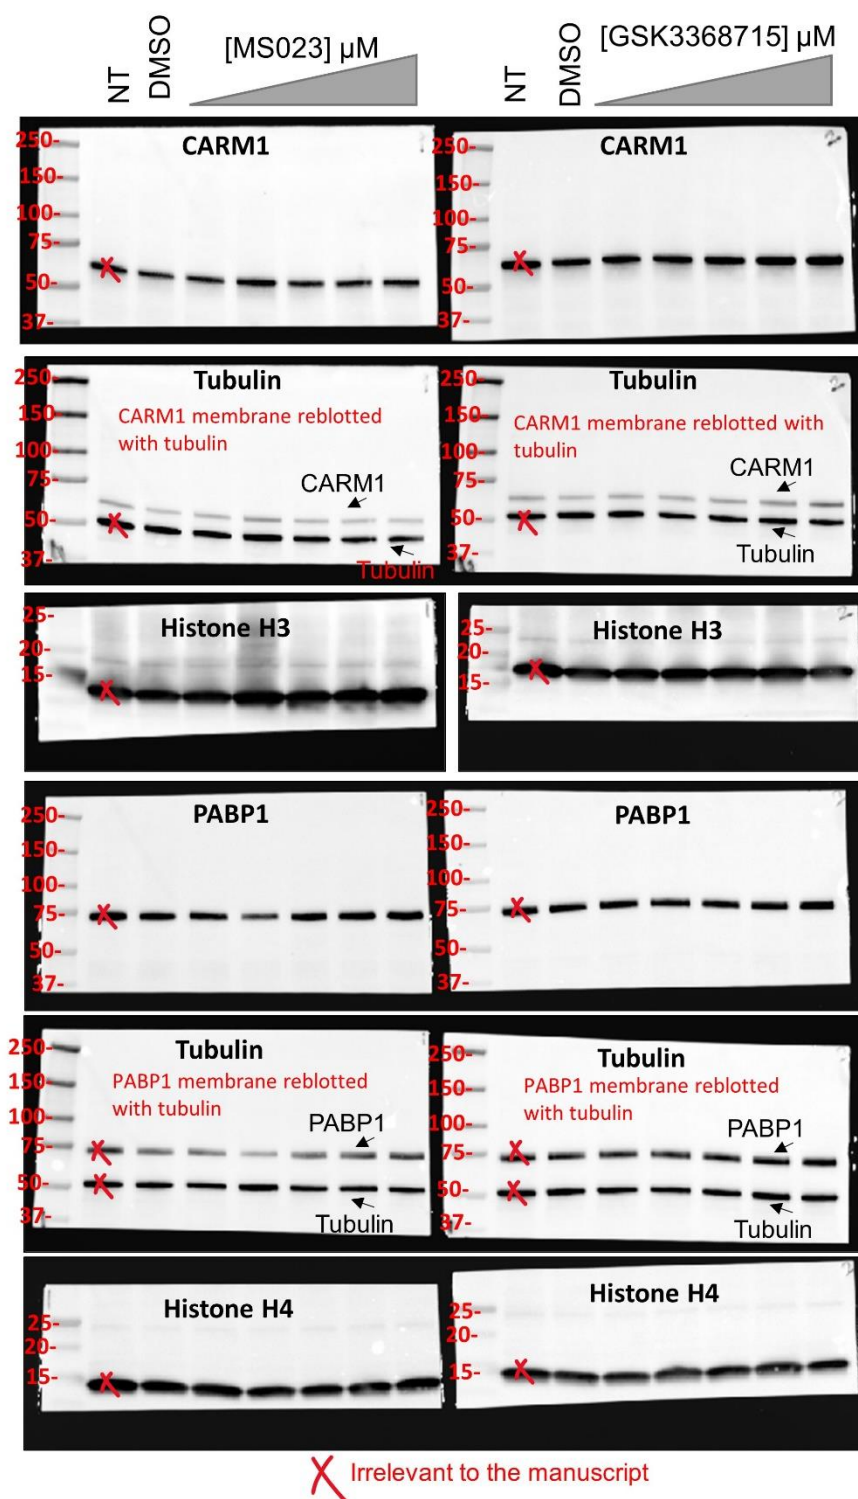

**Figure S20. Remaining uncropped original blots of Figure S3. NT- non treated.**

**Figure S21**

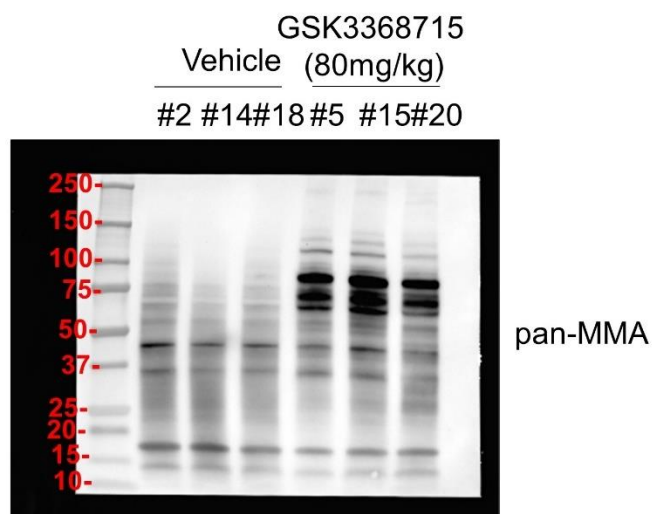

**Figure S21. Uncropped original blot of Figure S5B.**

**Table S1. (separate file)**

Antibodies, primers, siRNAs and drugs

**Table S2. (separate file)**

Differentially expressed genes in PRMT1-depleted MDA-MB-468 cells

**Table S3. (separate file)**

PRMT1 DNA copy number gain and loss in the curie cohort
